# Supplementary material for: Towards a more molecular taxonomy of disease
Source: PubMed Central journal article supplement (PMC5530939; doi:10.1186/s13326-017-0134-0), 2017-07-27
Supplement: 13326_2017_134_MOESM1_ESM.pdf [file 13326_2017_134_MOESM1_ESM.pdf]

## Full experimental results for disease hierarchy inference using the Medical Subject Headings (MeSH) trees

Table 1: **Edge Correctness (EC) and Ancestor Correctness (AC) for the MeSH subtrees used for method development.** Best performance across different inference methods is highlighted.

| Root Disease                | Edge Correctness |             |      | Ancestor Correctness |             |      |
|-----------------------------|------------------|-------------|------|----------------------|-------------|------|
|                             | Parent Promotion | CliXO       | MWST | Parent Promotion     | CliXO       | MWST |
| Infant, Premature, Diseases | 0.19             | <b>0.40</b> | 0.20 | <b>0.60</b>          | <b>0.60</b> | 0.57 |
| Dementia                    | 0.50             | <b>0.75</b> | 0.25 | 0.67                 | <b>0.84</b> | 0.39 |
| Respiration Disorder        | 0.36             | <b>0.50</b> | 0.14 | 0.52                 | <b>0.63</b> | 0.34 |
| Eye Diseases                | <b>0.19</b>      | 0.13        | 0.06 | <b>0.45</b>          | 0.32        | 0.12 |

Table 2: **F-score with Ancestor Precision (AP) and Ancestor Recall (AR) for the MeSH subtrees used for method development.** Best performance across different inference methods is highlighted.

| Root Disease                | (AP, AR) F-score              |             |                               |             |                        |      |
|-----------------------------|-------------------------------|-------------|-------------------------------|-------------|------------------------|------|
|                             | Parent Promotion              |             | CliXO                         |             | MWST                   |      |
| Infant, Premature, Diseases | ( <b>0.70</b> , <b>0.90</b> ) | <b>0.79</b> | ( 0.60 , 0.80 )               | 0.69        | ( 0.67 , <b>0.90</b> ) | 0.77 |
| Dementia                    | ( 0.70 , 0.86 )               | 0.77        | ( <b>0.85</b> , <b>0.94</b> ) | <b>0.90</b> | ( 0.41 , 0.82 )        | 0.55 |
| Respiration Disorders       | ( 0.62 , 0.79 )               | 0.69        | ( <b>0.69</b> , 0.85 )        | <b>0.76</b> | ( 0.35 , <b>0.92</b> ) | 0.50 |
| Eye Diseases                | ( <b>0.64</b> , <b>0.64</b> ) | <b>0.64</b> | ( 0.41 , 0.53 )               | 0.46        | ( 0.14 , 0.60 )        | 0.23 |

Table 3: **23 MeSH disease trees of various sizes and size of corresponding disease hierarchies inferred by CliXO.** We tested our inference methods by building disease hierarchies for the MeSH terms belonging to 23 different trees. While organizing disease terms in forms of trees, the MeSH allows multiple nodes to have same disease name. We treat these nodes as they are the same node and therefore, the MeSH trees are rather DAGs than trees. As shown below, most MeSH trees with  $n$  nodes have more than  $n - 1$  edges after collapsing duplicate nodes. The table also reports the number of nodes and edges created by CliXO. Unlike Parent Promotion and MWST, build trees with the same set of disease nodes as the reference, CliXO builds a DAG and does not necessarily have the same set of disease nodes as reference.

| Root Disease                                                    | MeSH trees        |        | Inferred hierarchies by CliXO |        |
|-----------------------------------------------------------------|-------------------|--------|-------------------------------|--------|
|                                                                 | #Diseases (Nodes) | #Edges | #Diseases (Nodes)             | #Edges |
| Bacterial Infections and Mycoses                                | 142               | 141    | 114                           | 158    |
| Virus Diseases                                                  | 86                | 85     | 165                           | 365    |
| Parasitic Diseases                                              | 37                | 36     | 66                            | 93     |
| Neoplasms                                                       | 402               | 401    | 457                           | 806    |
| Musculoskeletal Diseases                                        | 227               | 226    | 343                           | 696    |
| Digestive System Diseases                                       | 179               | 178    | 314                           | 650    |
| Stomatognathic Diseases                                         | 111               | 110    | 167                           | 290    |
| Respiratory Tract Diseases                                      | 126               | 125    | 261                           | 539    |
| Otorhinolaryngologic Diseases                                   | 65                | 64     | 132                           | 181    |
| Nervous System Diseases                                         | 566               | 565    | 611                           | 1124   |
| Male Urogenital Diseases                                        | 138               | 137    | 282                           | 654    |
| Female Urogenital Diseases and Pregnancy Complications          | 203               | 202    | 301                           | 501    |
| Cardiovascular Diseases                                         | 266               | 265    | 364                           | 776    |
| Hemic and Lymphatic Diseases                                    | 197               | 196    | 281                           | 464    |
| Congenital, Hereditary, and Neonatal Diseases and Abnormalities | 579               | 578    | 664                           | 1167   |
| Skin and Connective Tissue Diseases                             | 240               | 239    | 258                           | 439    |
| Nutritional and Metabolic Diseases                              | 282               | 281    | 440                           | 817    |
| Endocrine System Diseases                                       | 121               | 120    | 323                           | 833    |
| Immune System Diseases                                          | 163               | 162    | 293                           | 560    |
| Pathological Conditions, Signs and Symptoms                     | 447               | 446    | 584                           | 1581   |
| Occupational Diseases                                           | 15                | 14     | 36                            | 49     |
| Chemically-Induced Disorders                                    | 53                | 52     | 150                           | 277    |
| Wounds and Injuries                                             | 74                | 73     | 107                           | 165    |

Table 4: **Edge correctness (EC) for 23 MeSH disease trees.** Best performance across different inference methods is highlighted.

| Root Disease                                                    | Edge Correctness |             |             |
|-----------------------------------------------------------------|------------------|-------------|-------------|
|                                                                 | Parent Promotion | CliXO       | MWST        |
| Bacterial Infections and Mycoses                                | <b>0.05</b>      | <b>0.05</b> | 0.01        |
| Virus Diseases                                                  | <b>0.19</b>      | 0.14        | 0.09        |
| Parasitic Diseases                                              | <b>0.26</b>      | 0.23        | 0.09        |
| Neoplasms                                                       | <b>0.08</b>      | 0.04        | 0.03        |
| Musculoskeletal Diseases                                        | <b>0.12</b>      | 0.06        | 0.05        |
| Digestive System Diseases                                       | <b>0.14</b>      | 0.11        | 0.03        |
| Stomatognathic Diseases                                         | 0.05             | <b>0.17</b> | 0.04        |
| Respiratory Tract Diseases                                      | <b>0.15</b>      | 0.14        | 0.04        |
| Otorhinolaryngologic Diseases                                   | 0.12             | <b>0.17</b> | 0.08        |
| Nervous System Diseases                                         | <b>0.09</b>      | 0.06        | 0.04        |
| Male Urogenital Diseases                                        | <b>0.09</b>      | 0.08        | <b>0.09</b> |
| Female Urogenital Diseases and Pregnancy Complications          | <b>0.13</b>      | 0.08        | 0.07        |
| Cardiovascular Diseases                                         | <b>0.07</b>      | 0.04        | 0.04        |
| Hemic and Lymphatic Diseases                                    | 0.08             | <b>0.10</b> | 0.04        |
| Congenital, Hereditary, and Neonatal Diseases and Abnormalities | <b>0.09</b>      | 0.06        | 0.06        |
| Skin and Connective Tissue Diseases                             | <b>0.13</b>      | 0.06        | 0.07        |
| Nutritional and Metabolic Diseases                              | <b>0.10</b>      | 0.06        | 0.05        |
| Endocrine System Diseases                                       | <b>0.22</b>      | 0.15        | 0.14        |
| Immune System Diseases                                          | <b>0.11</b>      | 0.08        | 0.04        |
| Pathological Conditions, Signs and Symptoms                     | <b>0.10</b>      | 0.02        | 0.04        |
| Occupational Diseases                                           | 0.29             | <b>0.50</b> | 0.21        |
| Chemically-Induced Disorders                                    | <b>0.18</b>      | 0.15        | 0.15        |
| Wounds and Injuries                                             | <b>0.23</b>      | 0.20        | 0.05        |
| Average                                                         | <b>0.13</b>      | 0.12        | 0.07        |
| Standard Deviation                                              | 0.06             | 0.10        | 0.04        |

Table 5: **Ancestor correctness (AC) for 23 MeSH disease trees.** Best performance across different inference methods is highlighted.

| Root Disease                                                    | Ancestor Correctness |             |      |
|-----------------------------------------------------------------|----------------------|-------------|------|
|                                                                 | Parent Promotion     | CliXO       | MWST |
| Bacterial Infections and Mycoses                                | <b>0.15</b>          | 0.11        | 0.08 |
| Virus Diseases                                                  | <b>0.36</b>          | 0.29        | 0.16 |
| Parasitic Diseases                                              | <b>0.47</b>          | 0.46        | 0.23 |
| Neoplasms                                                       | <b>0.29</b>          | 0.10        | 0.08 |
| Musculoskeletal Diseases                                        | <b>0.36</b>          | 0.21        | 0.11 |
| Digestive System Diseases                                       | <b>0.39</b>          | 0.26        | 0.10 |
| Stomatognathic Diseases                                         | <b>0.22</b>          | 0.18        | 0.09 |
| Respiratory Tract Diseases                                      | <b>0.37</b>          | 0.30        | 0.11 |
| Otorhinolaryngologic Diseases                                   | <b>0.24</b>          | 0.21        | 0.10 |
| Nervous System Diseases                                         | <b>0.29</b>          | 0.16        | 0.06 |
| Male Urogenital Diseases                                        | <b>0.32</b>          | 0.24        | 0.11 |
| Female Urogenital Diseases and Pregnancy Complications          | <b>0.19</b>          | 0.15        | 0.06 |
| Cardiovascular Diseases                                         | <b>0.28</b>          | 0.14        | 0.08 |
| Hemic and Lymphatic Diseases                                    | <b>0.24</b>          | 0.17        | 0.07 |
| Congenital, Hereditary, and Neonatal Diseases and Abnormalities | <b>0.27</b>          | 0.15        | 0.05 |
| Skin and Connective Tissue Diseases                             | <b>0.34</b>          | 0.14        | 0.09 |
| Nutritional and Metabolic Diseases                              | <b>0.34</b>          | 0.18        | 0.11 |
| Endocrine System Diseases                                       | <b>0.39</b>          | 0.26        | 0.10 |
| Immune System Diseases                                          | <b>0.35</b>          | 0.17        | 0.13 |
| Pathological Conditions, Signs and Symptoms                     | <b>0.05</b>          | 0.00        | 0.01 |
| Occupational Diseases                                           | 0.21                 | <b>0.60</b> | 0.40 |
| Chemically-Induced Disorders                                    | <b>0.29</b>          | 0.20        | 0.14 |
| Wounds and Injuries                                             | <b>0.50</b>          | 0.32        | 0.14 |
| Average                                                         | <b>0.30</b>          | 0.22        | 0.11 |
| Standard Deviation                                              | 0.10                 | 0.12        | 0.07 |

Table 6: **Ancestor Precision (AP), Ancestor Recall (AR) and F-score for 23 MeSH disease trees.** Best performance across different inference methods is highlighted.

| Root Disease                                                    | (AP, AR) F-score                          |                                    |                             |
|-----------------------------------------------------------------|-------------------------------------------|------------------------------------|-----------------------------|
|                                                                 | Parent Promotion                          | CliXO                              | MWST                        |
| Bacterial Infections and Mycoses                                | ( <b>0.21</b> , 0.28 ) <b>0.24</b>        | ( 0.13 , 0.24 ) 0.17               | ( 0.09 , <b>0.29</b> ) 0.14 |
| Virus Diseases                                                  | ( <b>0.47</b> , 0.67 ) <b>0.55</b>        | ( 0.36 , 0.57 ) 0.44               | ( 0.17 , <b>0.69</b> ) 0.28 |
| Parasitic Diseases                                              | ( <b>0.58</b> , <b>0.76</b> ) <b>0.66</b> | ( 0.55 , 0.67 ) 0.61               | ( 0.26 , 0.74 ) 0.39        |
| Neoplasms                                                       | ( <b>0.46</b> , 0.48 ) <b>0.47</b>        | ( 0.13 , 0.23 ) 0.16               | ( 0.10 , <b>0.51</b> ) 0.16 |
| Musculoskeletal Diseases                                        | ( <b>0.67</b> , <b>0.47</b> ) <b>0.55</b> | ( 0.36 , 0.39 ) 0.38               | ( 0.14 , 0.44 ) 0.21        |
| Digestive System Diseases                                       | ( <b>0.58</b> , <b>0.56</b> ) <b>0.57</b> | ( 0.37 , 0.39 ) 0.38               | ( 0.13 , 0.40 ) 0.19        |
| Stomatognathic Diseases                                         | ( <b>0.27</b> , <b>0.49</b> ) <b>0.35</b> | ( 0.21 , 0.34 ) 0.26               | ( 0.10 , 0.36 ) 0.15        |
| Respiratory Tract Diseases                                      | ( <b>0.55</b> , <b>0.60</b> ) <b>0.57</b> | ( 0.39 , 0.52 ) 0.45               | ( 0.16 , 0.55 ) 0.24        |
| Otorhinolaryngologic Diseases                                   | ( <b>0.34</b> , 0.40 ) <b>0.37</b>        | ( 0.28 , 0.37 ) 0.31               | ( 0.13 , <b>0.43</b> ) 0.20 |
| Nervous System Diseases                                         | ( <b>0.56</b> , <b>0.43</b> ) <b>0.49</b> | ( 0.25 , 0.31 ) 0.27               | ( 0.07 , 0.42 ) 0.12        |
| Male Urogenital Diseases                                        | ( <b>0.62</b> , <b>0.44</b> ) <b>0.52</b> | ( 0.43 , 0.42 ) 0.43               | ( 0.14 , 0.39 ) 0.21        |
| Female Urogenital Diseases and Pregnancy Complications          | ( <b>0.30</b> , <b>0.29</b> ) <b>0.29</b> | ( 0.21 , 0.28 ) 0.24               | ( 0.08 , 0.28 ) 0.12        |
| Cardiovascular Diseases                                         | ( <b>0.51</b> , <b>0.42</b> ) <b>0.46</b> | ( 0.24 , 0.24 ) 0.24               | ( 0.10 , 0.39 ) 0.16        |
| Hemic and Lymphatic Diseases                                    | ( <b>0.36</b> , <b>0.46</b> ) <b>0.40</b> | ( 0.25 , 0.31 ) 0.28               | ( 0.08 , 0.46 ) 0.13        |
| Congenital, Hereditary, and Neonatal Diseases and Abnormalities | ( <b>0.48</b> , <b>0.37</b> ) <b>0.42</b> | ( 0.25 , 0.29 ) 0.27               | ( 0.06 , 0.35 ) 0.10        |
| Skin and Connective Tissue Diseases                             | ( <b>0.51</b> , 0.50 ) <b>0.50</b>        | ( 0.20 , 0.30 ) 0.24               | ( 0.10 , <b>0.55</b> ) 0.17 |
| Nutritional and Metabolic Diseases                              | ( <b>0.65</b> , <b>0.43</b> ) <b>0.52</b> | ( 0.31 , 0.29 ) 0.30               | ( 0.14 , 0.42 ) 0.21        |
| Endocrine System Diseases                                       | ( <b>0.54</b> , <b>0.62</b> ) <b>0.57</b> | ( 0.34 , 0.47 ) 0.40               | ( 0.12 , 0.57 ) 0.20        |
| Immune System Diseases                                          | ( <b>0.60</b> , <b>0.47</b> ) <b>0.53</b> | ( 0.27 , 0.30 ) 0.28               | ( 0.16 , 0.46 ) 0.24        |
| Pathological Conditions, Signs and Symptoms                     | ( <b>0.06</b> , <b>0.10</b> ) <b>0.07</b> | ( 0.00 , 0.02 ) 0.01               | ( 0.01 , 0.07 ) 0.02        |
| Occupational Diseases                                           | ( 0.24 , 0.37 ) 0.29                      | ( <b>0.67</b> , 0.89 ) <b>0.77</b> | ( 0.44 , <b>0.93</b> ) 0.60 |
| Chemically-Induced Disorders                                    | ( <b>0.41</b> , 0.52 ) <b>0.46</b>        | ( 0.25 , 0.40 ) 0.31               | ( 0.17 , <b>0.54</b> ) 0.26 |
| Wounds and Injuries                                             | ( <b>0.59</b> , <b>0.74</b> ) <b>0.66</b> | ( 0.38 , 0.55 ) 0.45               | ( 0.16 , 0.73 ) 0.26        |
| Average                                                         | ( <b>0.46</b> , 0.47 ) <b>0.47</b>        | ( 0.30 , 0.38 ) 0.33               | ( 0.13 , <b>0.48</b> ) 0.21 |
| Standard Deviation                                              | ( 0.16 , 0.14 ) 0.15                      | ( 0.14 , 0.17 ) 0.15               | ( 0.08 , 0.18 ) 0.11        |
