# Supplementary material for: Towards a more molecular taxonomy of disease
Source: PubMed Central journal article supplement (PMC5530939; doi:10.1186/s13326-017-0134-0), 2017-07-27
Supplement: 13326_2017_134_MOESM2_ESM.pdf [file 13326_2017_134_MOESM2_ESM.pdf]

## Performance of Parent Promotion using disease-gene association information in two different data sources: Online Mendelian Inheritance in Man (OMIM) and Genopedia

Table 1: **The amount of disease-gene association data included in OMIM and Genopedia** The number of association pairs covered by OMIM and Genopedia is reported along with the number of genes and diseases in the pairs. The amount of disease-gene association information in the combination of OMIM and Genopedia is also included for comparison.

| Root Disease                                                    | OMIM         |              |              | Genopedia    |               |                | Combined     |               |                |
|-----------------------------------------------------------------|--------------|--------------|--------------|--------------|---------------|----------------|--------------|---------------|----------------|
|                                                                 | disease      | gene         | pair         | disease      | gene          | pair           | disease      | gene          | pair           |
| Bacterial Infections and Mycoses                                | 15           | 29           | 47           | 138          | 876           | 2,891          | 142          | 885           | 2,918          |
| Virus Diseases                                                  | 11           | 29           | 31           | 86           | 2,583         | 5,287          | 86           | 2,589         | 5,299          |
| Parasitic Diseases                                              | 1            | 17           | 17           | 37           | 296           | 704            | 37           | 298           | 709            |
| Neoplasms                                                       | 128          | 253          | 455          | 389          | 5,110         | 31,190         | 402          | 5,157         | 31,385         |
| Musculoskeletal Diseases                                        | 154          | 499          | 763          | 177          | 2,605         | 5,333          | 227          | 2,839         | 5,921          |
| Digestive System Diseases                                       | 61           | 180          | 212          | 175          | 3,478         | 11,604         | 179          | 3,528         | 11,698         |
| Stomatognathic Diseases                                         | 28           | 74           | 92           | 99           | 1,389         | 3,641          | 111          | 1,416         | 3,702          |
| Respiratory Tract Diseases                                      | 29           | 89           | 100          | 99           | 2,402         | 6,759          | 103          | 2,432         | 6,812          |
| Otorhinolaryngologic Diseases                                   | 23           | 149          | 171          | 60           | 812           | 1,670          | 65           | 909           | 1,810          |
| Nervous System Diseases                                         | 286          | 881          | 1,248        | 490          | 3,726         | 12,239         | 553          | 4,079         | 13,125         |
| Male Urogenital Diseases                                        | 73           | 221          | 271          | 126          | 2,998         | 7,055          | 138          | 3,069         | 7,219          |
| Female Urogenital Diseases and Pregnancy Complications          | 80           | 232          | 286          | 190          | 3,459         | 11,010         | 203          | 3,528         | 11,189         |
| Cardiovascular Diseases                                         | 96           | 248          | 338          | 250          | 4,319         | 15,052         | 266          | 4,370         | 15,206         |
| Hemic and Lymphatic Diseases                                    | 107          | 249          | 294          | 174          | 1,819         | 5,963          | 197          | 1,915         | 6,150          |
| Congenital, Hereditary, and Neonatal Diseases and Abnormalities | 501          | 1,541        | 2,255        | 412          | 2,899         | 7,429          | 573          | 3,599         | 9,029          |
| Skin and Connective Tissue Diseases                             | 136          | 337          | 431          | 188          | 3,095         | 7,565          | 240          | 3,234         | 7,856          |
| Nutritional and Metabolic Diseases                              | 222          | 695          | 832          | 218          | 4,816         | 11,919         | 282          | 5,070         | 12,452         |
| Endocrine System Diseases                                       | 75           | 228          | 281          | 113          | 4,700         | 10,563         | 121          | 4,743         | 10,700         |
| Immune System Diseases                                          | 56           | 197          | 224          | 151          | 4,294         | 11,806         | 163          | 4,330         | 11,924         |
| Pathological Conditions, Signs and Symptoms                     | 130          | 497          | 633          | 431          | 10,348        | 31,086         | 447          | 10,442        | 31,568         |
| Occupational Diseases                                           | 1            | 1            | 1            | 15           | 441           | 559            | 15           | 441           | 559            |
| Chemically-Induced Disorders                                    | 6            | 16           | 16           | 53           | 4,096         | 5,750          | 53           | 4,099         | 5,754          |
| Wounds and Injuries                                             | 4            | 4            | 4            | 72           | 490           | 1,000          | 74           | 493           | 1,003          |
| <b>Total</b>                                                    | <b>1,173</b> | <b>2,434</b> | <b>4,878</b> | <b>2,499</b> | <b>12,527</b> | <b>137,718</b> | <b>2,755</b> | <b>12,873</b> | <b>140,928</b> |

Table 2: **Size of reference and inferred disease hierarchies using OMIM and Genopedia.** The size of disease hierarchies inferred using disease-gene association information in OMIM and Genopedia is reported in terms of number of nodes and edges. The size of reference and inference made using both OMIM and Genopedia is reported together for comparison.

| Root Disease                                                    | OMIM  |       | Genopedia |       | Combined |       | Reference |       |
|-----------------------------------------------------------------|-------|-------|-----------|-------|----------|-------|-----------|-------|
|                                                                 | nodes | edges | nodes     | edges | nodes    | edges | nodes     | edges |
| Bacterial Infections and Mycoses                                | 15    | 14    | 138       | 137   | 142      | 141   | 142       | 179   |
| Virus Diseases                                                  | 11    | 10    | 86        | 85    | 86       | 85    | 86        | 112   |
| Parasitic Diseases                                              | 0     | 0     | 37        | 36    | 37       | 36    | 37        | 43    |
| Neoplasms                                                       | 128   | 127   | 389       | 388   | 402      | 401   | 402       | 511   |
| Musculoskeletal Diseases                                        | 154   | 153   | 177       | 176   | 227      | 226   | 227       | 279   |
| Digestive System Diseases                                       | 61    | 60    | 175       | 174   | 179      | 178   | 179       | 232   |
| Stomatognathic Diseases                                         | 28    | 27    | 99        | 98    | 111      | 110   | 111       | 120   |
| Respiratory Tract Diseases                                      | 29    | 28    | 99        | 98    | 103      | 102   | 103       | 131   |
| Otorhinolaryngologic Diseases                                   | 23    | 22    | 60        | 59    | 65       | 64    | 65        | 60    |
| Nervous System Diseases                                         | 286   | 285   | 490       | 489   | 553      | 552   | 553       | 723   |
| Male Urogenital Diseases                                        | 73    | 72    | 126       | 125   | 138      | 137   | 138       | 159   |
| Female Urogenital Diseases and Pregnancy Complications          | 80    | 79    | 190       | 189   | 203      | 202   | 203       | 231   |
| Cardiovascular Diseases                                         | 96    | 95    | 250       | 249   | 266      | 265   | 266       | 323   |
| Hemic and Lymphatic Diseases                                    | 107   | 106   | 174       | 173   | 197      | 196   | 197       | 265   |
| Congenital, Hereditary, and Neonatal Diseases and Abnormalities | 501   | 500   | 412       | 411   | 573      | 572   | 573       | 807   |
| Skin and Connective Tissue Diseases                             | 136   | 135   | 188       | 187   | 240      | 239   | 240       | 301   |
| Nutritional and Metabolic Diseases                              | 222   | 221   | 218       | 217   | 282      | 281   | 282       | 388   |
| Endocrine System Diseases                                       | 75    | 74    | 113       | 112   | 121      | 120   | 121       | 140   |
| Immune System Diseases                                          | 56    | 55    | 151       | 150   | 163      | 162   | 163       | 171   |
| Pathological Conditions, Signs and Symptoms                     | 130   | 129   | 431       | 430   | 447      | 446   | 447       | 303   |
| Occupational Diseases                                           | 0     | 0     | 15        | 14    | 15       | 14    | 15        | 14    |
| Chemically-Induced Disorders                                    | 6     | 5     | 53        | 52    | 53       | 52    | 53        | 55    |
| Wounds and Injuries                                             | 4     | 3     | 72        | 71    | 74       | 73    | 74        | 88    |

Table 3: **Ancestor correctness (AC) for 23 MeSH disease trees.**

| Root Disease                                                    | Ancestor Correctness |           |          |
|-----------------------------------------------------------------|----------------------|-----------|----------|
|                                                                 | OMIM                 | Genopedia | Combined |
| Bacterial Infections and Mycoses                                | 0.03                 | 0.17      | 0.15     |
| Virus Diseases                                                  | 0.00                 | 0.37      | 0.36     |
| Parasitic Diseases                                              | 0.00                 | 0.47      | 0.47     |
| Neoplasms                                                       | 0.01                 | 0.29      | 0.29     |
| Musculoskeletal Diseases                                        | 0.26                 | 0.29      | 0.36     |
| Digestive System Diseases                                       | 0.05                 | 0.38      | 0.39     |
| Stomatognathic Diseases                                         | 0.02                 | 0.20      | 0.22     |
| Respiratory Tract Diseases                                      | 0.15                 | 0.40      | 0.37     |
| Otorhinolaryngologic Diseases                                   | 0.09                 | 0.23      | 0.24     |
| Nervous System Diseases                                         | 0.17                 | 0.27      | 0.29     |
| Male Urogenital Diseases                                        | 0.17                 | 0.32      | 0.32     |
| Female Urogenital Diseases and Pregnancy Complications          | 0.11                 | 0.20      | 0.19     |
| Cardiovascular Diseases                                         | 0.07                 | 0.33      | 0.28     |
| Hemic and Lymphatic Diseases                                    | 0.19                 | 0.21      | 0.24     |
| Congenital, Hereditary, and Neonatal Diseases and Abnormalities | 0.24                 | 0.20      | 0.27     |
| Skin and Connective Tissue Diseases                             | 0.18                 | 0.27      | 0.34     |
| Nutritional and Metabolic Diseases                              | 0.01                 | 0.28      | 0.34     |
| Endocrine System Diseases                                       | 0.29                 | 0.36      | 0.39     |
| Immune System Diseases                                          | 0.14                 | 0.31      | 0.35     |
| Pathological Conditions, Signs and Symptoms                     | 0.01                 | 0.05      | 0.05     |
| Occupational Diseases                                           | 0.00                 | 0.21      | 0.21     |
| Chemically-Induced Disorders                                    | 0.01                 | 0.29      | 0.29     |
| Wounds and Injuries                                             | 0.00                 | 0.46      | 0.50     |
| Average                                                         | 0.10                 | 0.29      | 0.30     |
| Standard Deviation                                              | 0.09                 | 0.09      | 0.10     |

Table 4: **Ancestor Precision (AP), Ancestor Recall (AR) and F-score for 23 MeSH disease trees.**

| Root Disease                                                    | (AP, AR) F-score     |                      |                      |
|-----------------------------------------------------------------|----------------------|----------------------|----------------------|
|                                                                 | OMIM                 | Genopedia            | Combined             |
| Bacterial Infections and Mycoses                                | ( 0.03 , 0.04 ) 0.04 | ( 0.23 , 0.30 ) 0.26 | ( 0.21 , 0.28 ) 0.24 |
| Virus Diseases                                                  | ( 0.00 , 0.00 ) 0.00 | ( 0.50 , 0.66 ) 0.57 | ( 0.47 , 0.67 ) 0.55 |
| Parasitic Diseases                                              | ( 0.00 , 0.00 ) 0.00 | ( 0.58 , 0.76 ) 0.66 | ( 0.58 , 0.76 ) 0.66 |
| Neoplasms                                                       | ( 0.01 , 0.01 ) 0.01 | ( 0.46 , 0.47 ) 0.46 | ( 0.46 , 0.48 ) 0.47 |
| Musculoskeletal Diseases                                        | ( 0.50 , 0.32 ) 0.39 | ( 0.51 , 0.42 ) 0.46 | ( 0.67 , 0.47 ) 0.55 |
| Digestive System Diseases                                       | ( 0.10 , 0.07 ) 0.08 | ( 0.57 , 0.55 ) 0.56 | ( 0.58 , 0.56 ) 0.57 |
| Stomatognathic Diseases                                         | ( 0.03 , 0.06 ) 0.04 | ( 0.25 , 0.43 ) 0.32 | ( 0.27 , 0.49 ) 0.35 |
| Respiratory Tract Diseases                                      | ( 0.17 , 0.24 ) 0.20 | ( 0.59 , 0.56 ) 0.58 | ( 0.55 , 0.60 ) 0.57 |
| Otorhinolaryngologic Diseases                                   | ( 0.17 , 0.11 ) 0.13 | ( 0.32 , 0.38 ) 0.35 | ( 0.34 , 0.40 ) 0.37 |
| Nervous System Diseases                                         | ( 0.35 , 0.23 ) 0.28 | ( 0.50 , 0.40 ) 0.44 | ( 0.56 , 0.43 ) 0.49 |
| Male Urogenital Diseases                                        | ( 0.32 , 0.23 ) 0.27 | ( 0.62 , 0.38 ) 0.47 | ( 0.62 , 0.44 ) 0.52 |
| Female Urogenital Diseases and Pregnancy Complications          | ( 0.14 , 0.17 ) 0.15 | ( 0.28 , 0.30 ) 0.29 | ( 0.30 , 0.29 ) 0.29 |
| Cardiovascular Diseases                                         | ( 0.12 , 0.13 ) 0.13 | ( 0.51 , 0.47 ) 0.49 | ( 0.51 , 0.42 ) 0.46 |
| Hemic and Lymphatic Diseases                                    | ( 0.33 , 0.23 ) 0.27 | ( 0.31 , 0.37 ) 0.34 | ( 0.36 , 0.46 ) 0.40 |
| Congenital, Hereditary, and Neonatal Diseases and Abnormalities | ( 0.44 , 0.31 ) 0.36 | ( 0.30 , 0.35 ) 0.33 | ( 0.48 , 0.37 ) 0.42 |
| Skin and Connective Tissue Diseases                             | ( 0.28 , 0.28 ) 0.28 | ( 0.40 , 0.41 ) 0.40 | ( 0.51 , 0.50 ) 0.50 |
| Nutritional and Metabolic Diseases                              | ( 0.03 , 0.02 ) 0.02 | ( 0.48 , 0.35 ) 0.40 | ( 0.65 , 0.43 ) 0.52 |
| Endocrine System Diseases                                       | ( 0.42 , 0.37 ) 0.39 | ( 0.50 , 0.56 ) 0.53 | ( 0.54 , 0.62 ) 0.57 |
| Immune System Diseases                                          | ( 0.24 , 0.18 ) 0.21 | ( 0.53 , 0.43 ) 0.48 | ( 0.60 , 0.47 ) 0.53 |
| Pathological Conditions, Signs and Symptoms                     | ( 0.01 , 0.02 ) 0.01 | ( 0.06 , 0.10 ) 0.07 | ( 0.06 , 0.10 ) 0.07 |
| Occupational Diseases                                           | ( 0.00 , 0.00 ) 0.00 | ( 0.24 , 0.37 ) 0.29 | ( 0.24 , 0.37 ) 0.29 |
| Chemically-Induced Disorders                                    | ( 0.02 , 0.01 ) 0.01 | ( 0.41 , 0.52 ) 0.46 | ( 0.41 , 0.52 ) 0.46 |
| Wounds and Injuries                                             | ( 0.00 , 0.00 ) 0.00 | ( 0.56 , 0.71 ) 0.63 | ( 0.59 , 0.74 ) 0.66 |
| Average                                                         | ( 0.16 , 0.13 ) 0.14 | ( 0.42 , 0.44 ) 0.43 | ( 0.46 , 0.47 ) 0.47 |
| Standard Deviation                                              | ( 0.16 , 0.12 ) 0.14 | ( 0.14 , 0.14 ) 0.14 | ( 0.16 , 0.14 ) 0.15 |
