# Supplementary material for: Towards a more molecular taxonomy of disease
Source: PubMed Central journal article supplement (PMC5530939; doi:10.1186/s13326-017-0134-0), 2017-07-27
Supplement: 13326_2017_134_MOESM3_ESM.pdf [file 13326_2017_134_MOESM3_ESM.pdf]

## Change in performance of Parent Promotion depending on the size of available disease-gene association information

Table 1: Edge correctness (EC) for 23 MeSH disease trees.

| Root Disease                                                    | Edge Correctness |              |               |
|-----------------------------------------------------------------|------------------|--------------|---------------|
|                                                                 | 50% withheld     | 25% withheld | None withheld |
| Bacterial Infections and Mycoses                                | 0.06             | 0.06         | 0.05          |
| Virus Diseases                                                  | 0.15             | 0.16         | 0.19          |
| Parasitic Diseases                                              | 0.24             | 0.32         | 0.26          |
| Neoplasms                                                       | 0.07             | 0.08         | 0.08          |
| Musculoskeletal Diseases                                        | 0.08             | 0.10         | 0.12          |
| Digestive System Diseases                                       | 0.09             | 0.11         | 0.14          |
| Stomatognathic Diseases                                         | 0.08             | 0.08         | 0.05          |
| Respiratory Tract Diseases                                      | 0.15             | 0.13         | 0.16          |
| Otorhinolaryngologic Diseases                                   | 0.12             | 0.15         | 0.12          |
| Nervous System Diseases                                         | 0.06             | 0.09         | 0.09          |
| Male Urogenital Diseases                                        | 0.10             | 0.11         | 0.09          |
| Female Urogenital Diseases and Pregnancy Complications          | 0.08             | 0.11         | 0.13          |
| Cardiovascular Diseases                                         | 0.07             | 0.08         | 0.07          |
| Hemic and Lymphatic Diseases                                    | 0.07             | 0.08         | 0.08          |
| Congenital, Hereditary, and Neonatal Diseases and Abnormalities | 0.06             | 0.08         | 0.10          |
| Skin and Connective Tissue Diseases                             | 0.09             | 0.12         | 0.13          |
| Nutritional and Metabolic Diseases                              | 0.08             | 0.08         | 0.10          |
| Endocrine System Diseases                                       | 0.18             | 0.19         | 0.22          |
| Immune System Diseases                                          | 0.10             | 0.10         | 0.11          |
| Pathological Conditions, Signs and Symptoms                     | 0.06             | 0.08         | 0.10          |
| Occupational Diseases                                           | 0.21             | 0.18         | 0.29          |
| Chemically-Induced Disorders                                    | 0.15             | 0.15         | 0.18          |
| Wounds and Injuries                                             | 0.12             | 0.20         | 0.23          |
| Average                                                         | 0.11             | 0.12         | 0.13          |
| Standard Deviation                                              | 0.05             | 0.06         | 0.06          |

Table 2: **Ancestor correctness (AC) for 23 MeSH disease trees.** Best performance across different inference methods is highlighted.

| Root Disease                                                    | Ancestor Correctness |              |               |
|-----------------------------------------------------------------|----------------------|--------------|---------------|
|                                                                 | 50% withheld         | 25% withheld | None withheld |
| Bacterial Infections and Mycoses                                | 0.17                 | 0.19         | 0.15          |
| Virus Diseases                                                  | 0.35                 | 0.38         | 0.36          |
| Parasitic Diseases                                              | 0.49                 | 0.51         | 0.47          |
| Neoplasms                                                       | 0.28                 | 0.30         | 0.29          |
| Musculoskeletal Diseases                                        | 0.31                 | 0.33         | 0.36          |
| Digestive System Diseases                                       | 0.29                 | 0.34         | 0.39          |
| Stomatognathic Diseases                                         | 0.20                 | 0.22         | 0.22          |
| Respiratory Tract Diseases                                      | 0.41                 | 0.40         | 0.37          |
| Otorhinolaryngologic Diseases                                   | 0.22                 | 0.26         | 0.24          |
| Nervous System Diseases                                         | 0.26                 | 0.29         | 0.29          |
| Male Urogenital Diseases                                        | 0.30                 | 0.36         | 0.32          |
| Female Urogenital Diseases and Pregnancy Complications          | 0.19                 | 0.21         | 0.19          |
| Cardiovascular Diseases                                         | 0.30                 | 0.30         | 0.28          |
| Hemic and Lymphatic Diseases                                    | 0.22                 | 0.24         | 0.24          |
| Congenital, Hereditary, and Neonatal Diseases and Abnormalities | 0.22                 | 0.25         | 0.27          |
| Skin and Connective Tissue Diseases                             | 0.26                 | 0.29         | 0.34          |
| Nutritional and Metabolic Diseases                              | 0.27                 | 0.31         | 0.34          |
| Endocrine System Diseases                                       | 0.39                 | 0.39         | 0.39          |
| Immune System Diseases                                          | 0.32                 | 0.34         | 0.35          |
| Pathological Conditions, Signs and Symptoms                     | 0.03                 | 0.04         | 0.05          |
| Occupational Diseases                                           | 0.14                 | 0.10         | 0.21          |
| Chemically-Induced Disorders                                    | 0.28                 | 0.27         | 0.29          |
| Wounds and Injuries                                             | 0.35                 | 0.43         | 0.50          |
| Average                                                         | 0.27                 | 0.29         | 0.30          |
| Standard Deviation                                              | 0.09                 | 0.10         | 0.10          |

Table 3: **Ancestor Precision (AP), Ancestor Recall (AR) and F-score for 23 MeSH disease trees.** Best performance across different inference methods is highlighted.

| Root Disease                                                    | (AP, AR) F-score     |                      |                      |
|-----------------------------------------------------------------|----------------------|----------------------|----------------------|
|                                                                 | 50% withheld         | 25% withheld         | None withheld        |
| Bacterial Infections and Mycoses                                | ( 0.24 , 0.30 ) 0.27 | ( 0.26 , 0.33 ) 0.29 | ( 0.21 , 0.28 ) 0.24 |
| Virus Diseases                                                  | ( 0.48 , 0.61 ) 0.00 | ( 0.53 , 0.65 ) 0.58 | ( 0.47 , 0.67 ) 0.55 |
| Parasitic Diseases                                              | ( 0.59 , 0.73 ) 0.00 | ( 0.62 , 0.75 ) 0.68 | ( 0.58 , 0.76 ) 0.66 |
| Neoplasms                                                       | ( 0.46 , 0.42 ) 0.44 | ( 0.48 , 0.46 ) 0.47 | ( 0.46 , 0.48 ) 0.47 |
| Musculoskeletal Diseases                                        | ( 0.61 , 0.39 ) 0.48 | ( 0.64 , 0.44 ) 0.52 | ( 0.67 , 0.47 ) 0.55 |
| Digestive System Diseases                                       | ( 0.50 , 0.44 ) 0.47 | ( 0.54 , 0.49 ) 0.51 | ( 0.58 , 0.56 ) 0.57 |
| Stomatognathic Diseases                                         | ( 0.26 , 0.38 ) 0.31 | ( 0.27 , 0.45 ) 0.34 | ( 0.27 , 0.49 ) 0.35 |
| Respiratory Tract Diseases                                      | ( 0.61 , 0.54 ) 0.57 | ( 0.61 , 0.56 ) 0.59 | ( 0.55 , 0.60 ) 0.57 |
| Otorhinolaryngologic Diseases                                   | ( 0.33 , 0.29 ) 0.31 | ( 0.36 , 0.37 ) 0.36 | ( 0.34 , 0.40 ) 0.37 |
| Nervous System Diseases                                         | ( 0.50 , 0.36 ) 0.42 | ( 0.56 , 0.41 ) 0.47 | ( 0.56 , 0.43 ) 0.49 |
| Male Urogenital Diseases                                        | ( 0.56 , 0.39 ) 0.46 | ( 0.60 , 0.47 ) 0.53 | ( 0.62 , 0.44 ) 0.52 |
| Female Urogenital Diseases and Pregnancy Complications          | ( 0.29 , 0.28 ) 0.29 | ( 0.28 , 0.33 ) 0.30 | ( 0.30 , 0.29 ) 0.29 |
| Cardiovascular Diseases                                         | ( 0.55 , 0.39 ) 0.46 | ( 0.54 , 0.42 ) 0.47 | ( 0.51 , 0.42 ) 0.46 |
| Hemic and Lymphatic Diseases                                    | ( 0.35 , 0.35 ) 0.35 | ( 0.36 , 0.38 ) 0.37 | ( 0.36 , 0.46 ) 0.40 |
| Congenital, Hereditary, and Neonatal Diseases and Abnormalities | ( 0.38 , 0.29 ) 0.33 | ( 0.43 , 0.37 ) 0.40 | ( 0.48 , 0.37 ) 0.42 |
| Skin and Connective Tissue Diseases                             | ( 0.41 , 0.41 ) 0.41 | ( 0.44 , 0.46 ) 0.45 | ( 0.51 , 0.50 ) 0.50 |
| Nutritional and Metabolic Diseases                              | ( 0.53 , 0.35 ) 0.42 | ( 0.59 , 0.40 ) 0.48 | ( 0.65 , 0.43 ) 0.52 |
| Endocrine System Diseases                                       | ( 0.56 , 0.55 ) 0.55 | ( 0.55 , 0.58 ) 0.56 | ( 0.54 , 0.62 ) 0.57 |
| Immune System Diseases                                          | ( 0.51 , 0.47 ) 0.49 | ( 0.56 , 0.49 ) 0.52 | ( 0.60 , 0.47 ) 0.53 |
| Pathological Conditions, Signs and Symptoms                     | ( 0.04 , 0.06 ) 0.05 | ( 0.05 , 0.08 ) 0.06 | ( 0.06 , 0.10 ) 0.07 |
| Occupational Diseases                                           | ( 0.14 , 0.27 ) 0.00 | ( 0.15 , 0.17 ) 0.16 | ( 0.24 , 0.37 ) 0.29 |
| Chemically-Induced Disorders                                    | ( 0.37 , 0.41 ) 0.39 | ( 0.37 , 0.46 ) 0.41 | ( 0.41 , 0.52 ) 0.46 |
| Wounds and Injuries                                             | ( 0.43 , 0.62 ) 0.00 | ( 0.52 , 0.71 ) 0.60 | ( 0.59 , 0.74 ) 0.66 |
| Average                                                         | ( 0.42 , 0.41 ) 0.41 | ( 0.45 , 0.44 ) 0.44 | ( 0.46 , 0.47 ) 0.46 |
| Standard Deviation                                              | ( 0.15 , 0.14 ) 0.14 | ( 0.16 , 0.15 ) 0.14 | ( 0.16 , 0.14 ) 0.14 |
